# Supplementary material for: A bacterial effector counteracts host autophagy by promoting degradation of an autophagy component
Source: PubMed Central journal article supplement (PMC9251887; doi:10.15252/embj.2021110352), 2022-05-27
Supplement: EMBJ-41-e110352-s007.pdf [file EMBJ-41-e110352-s007.pdf]

**5A**

anti-GFP

anti-RFP

100kDa&gt;

25kDa&gt;

35kDa&gt;

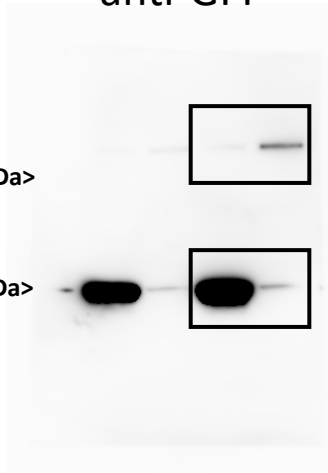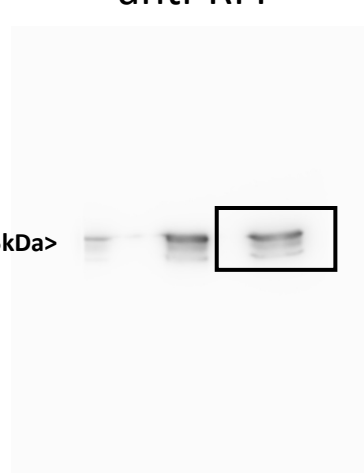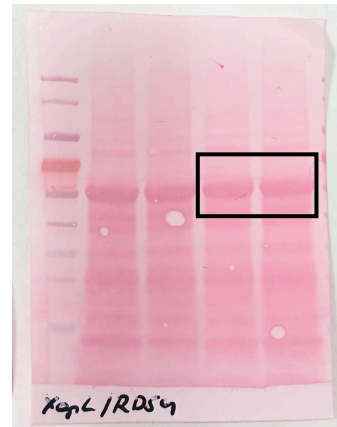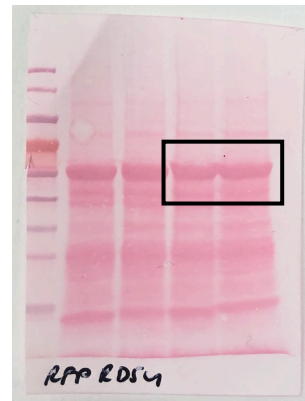**5D**

anti-GFP

100kDa&gt;

100kDa&gt;

100kDa&gt;

25kDa&gt;

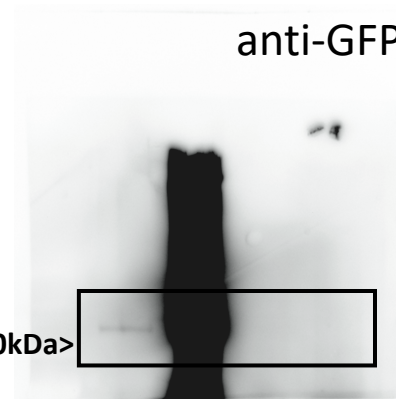

anti-GFP

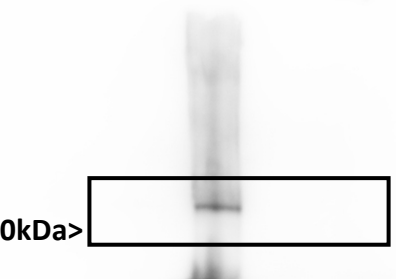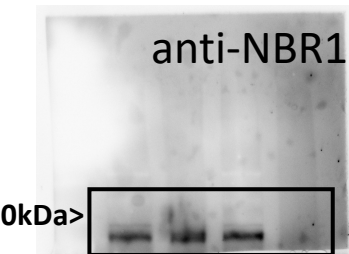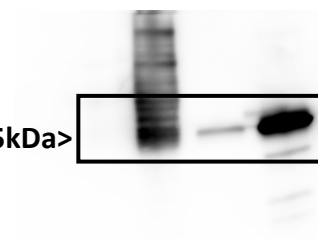

anti-GFP

**5E**

anti-NBR1

anti-GFP

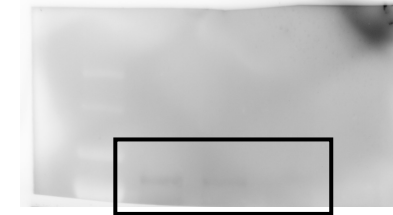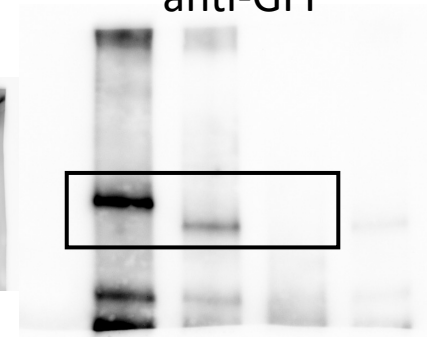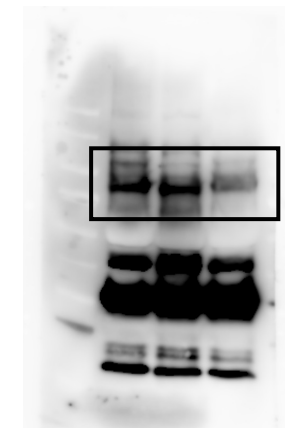

anti-NBR1

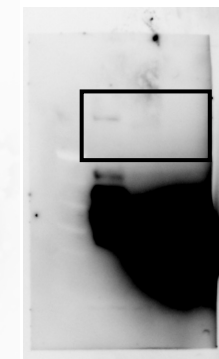

anti-GFP

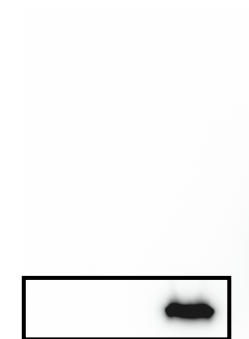

anti-GFP

5F

anti-NBR1

100kDa>

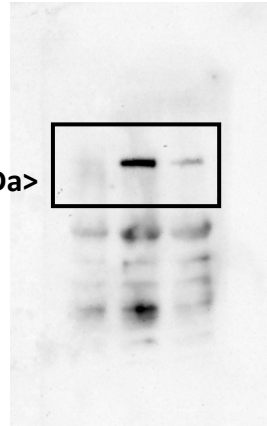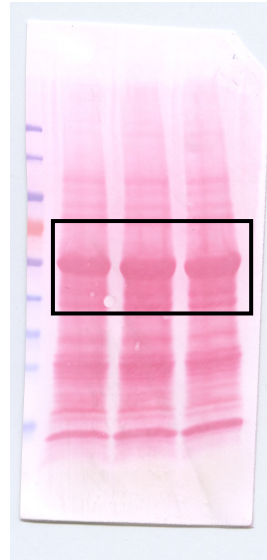

5H

IP::GFP

anti-GFP

100kDa>

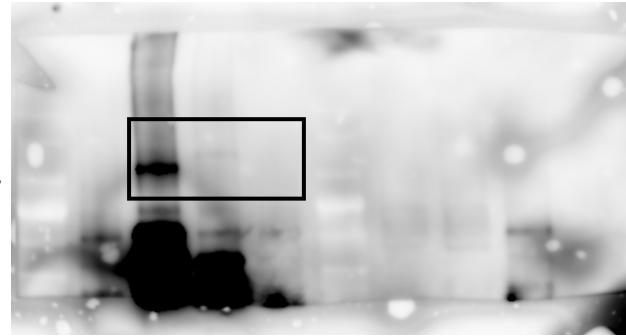

anti-GFP

25kDa>

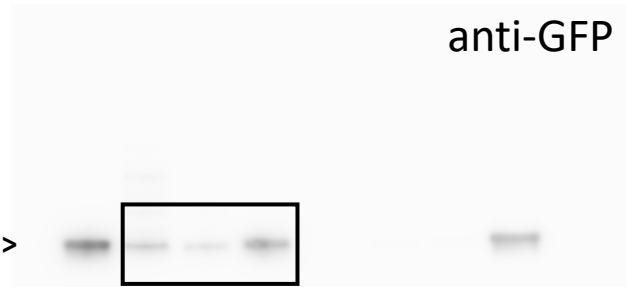

anti-UBQ

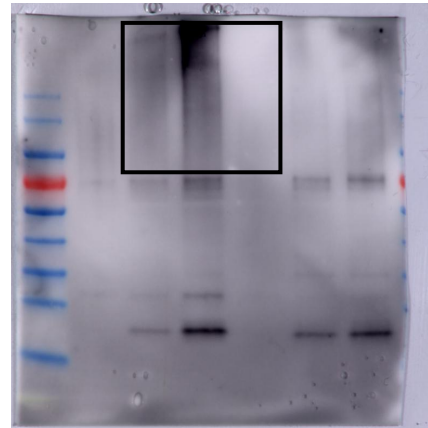

5J

100kDa>

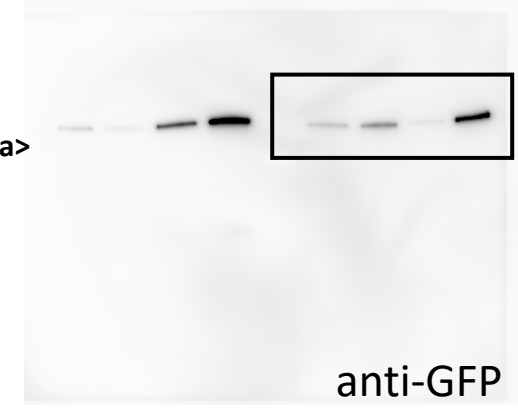

anti-GFP

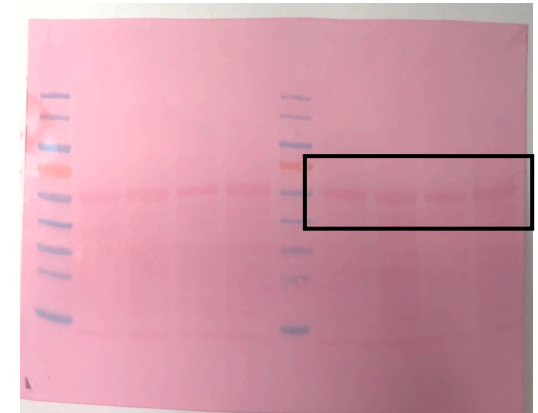

5K

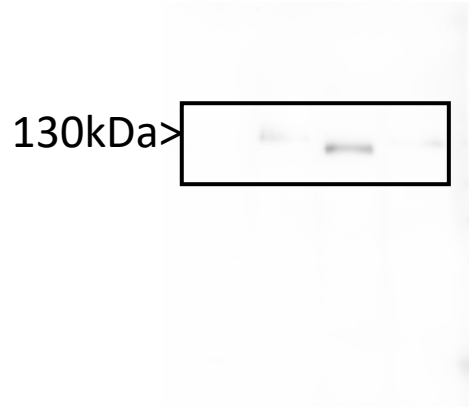

Input

anti-GFP

IP:GFP

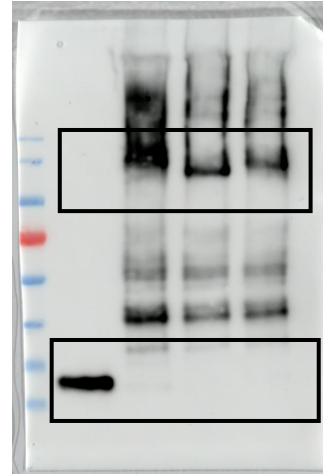

anti-GFP

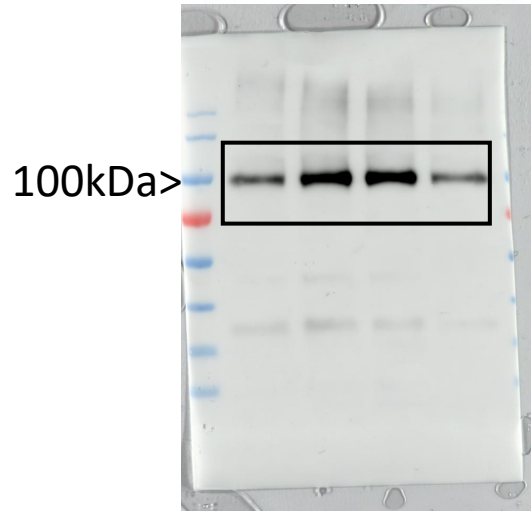

anti-HA

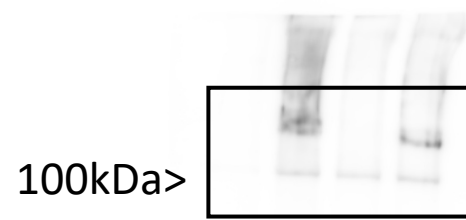

anti-HA

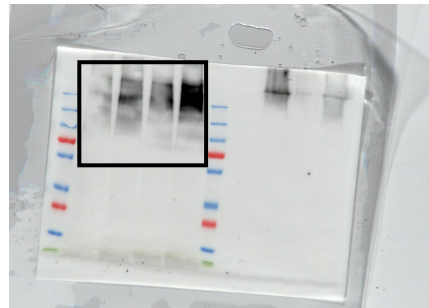

anti-UBQ

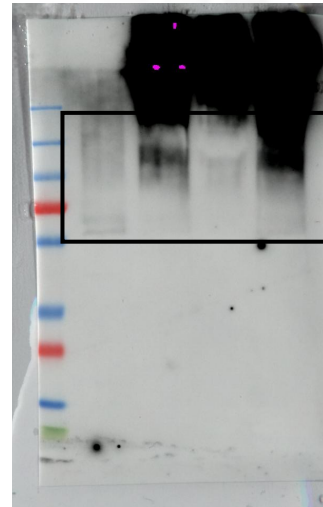

anti-UBQ
