# Supplementary material for: A bacterial effector counteracts host autophagy by promoting degradation of an autophagy component
Source: PubMed Central journal article supplement (PMC9251887; doi:10.15252/embj.2021110352), 2022-05-27

**Figure 2B**

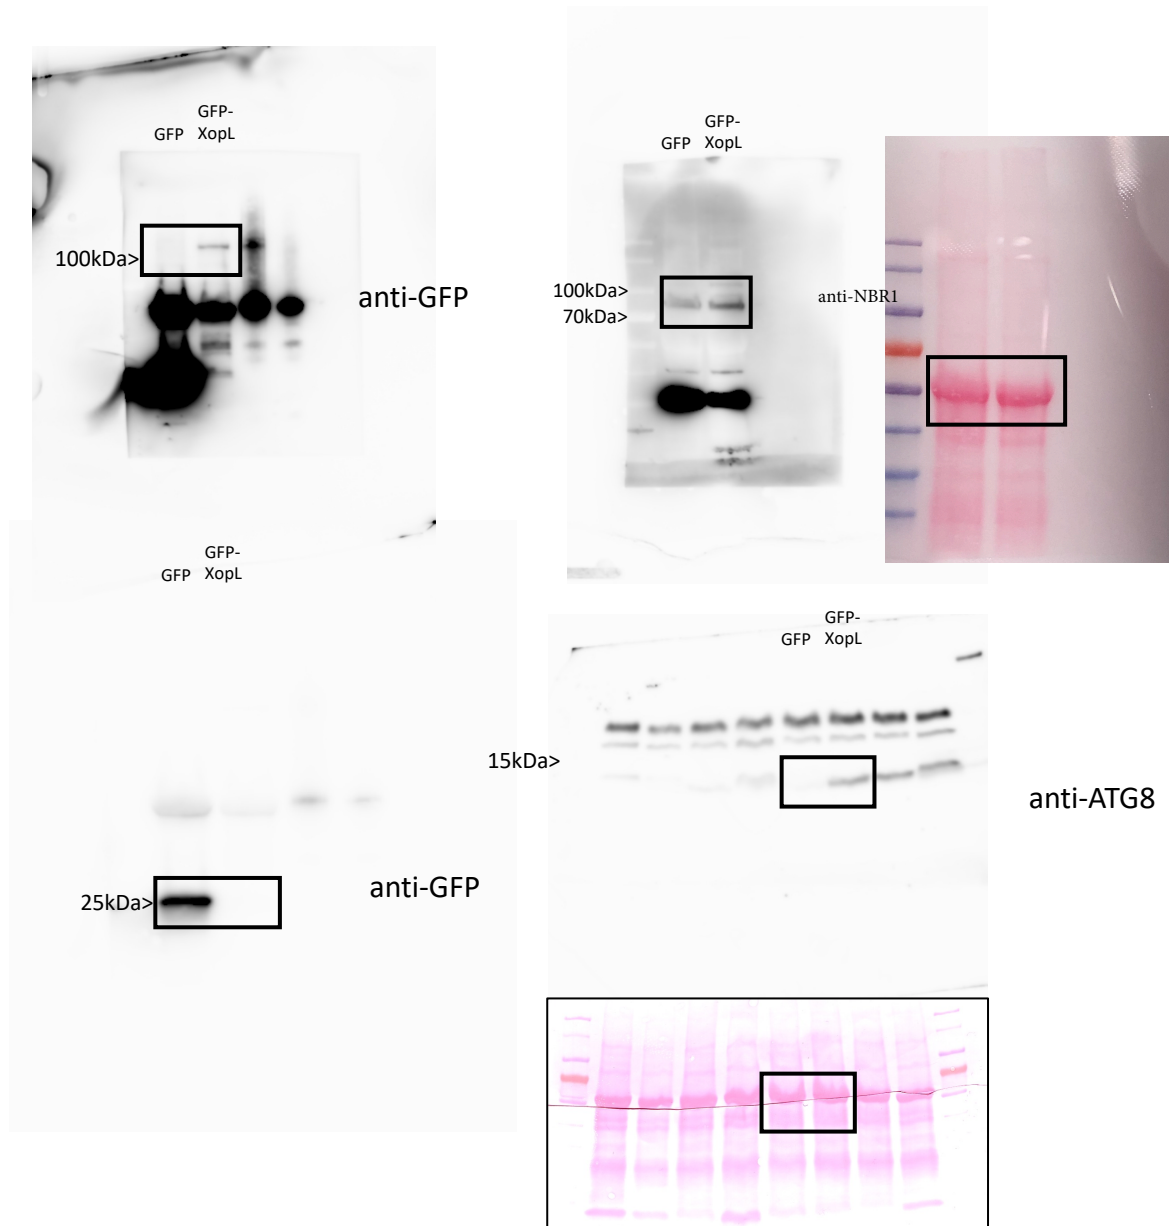

**Figure 2C**

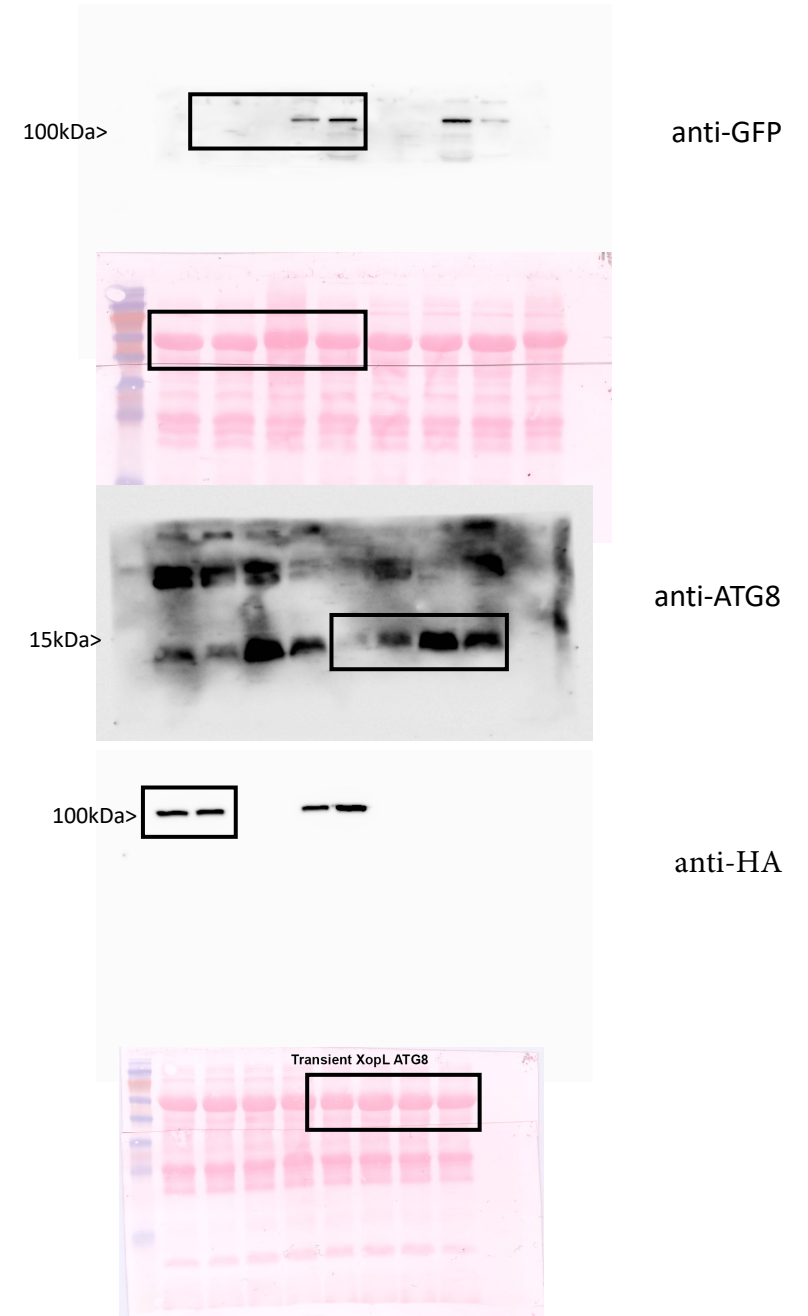

**Figure 2E**

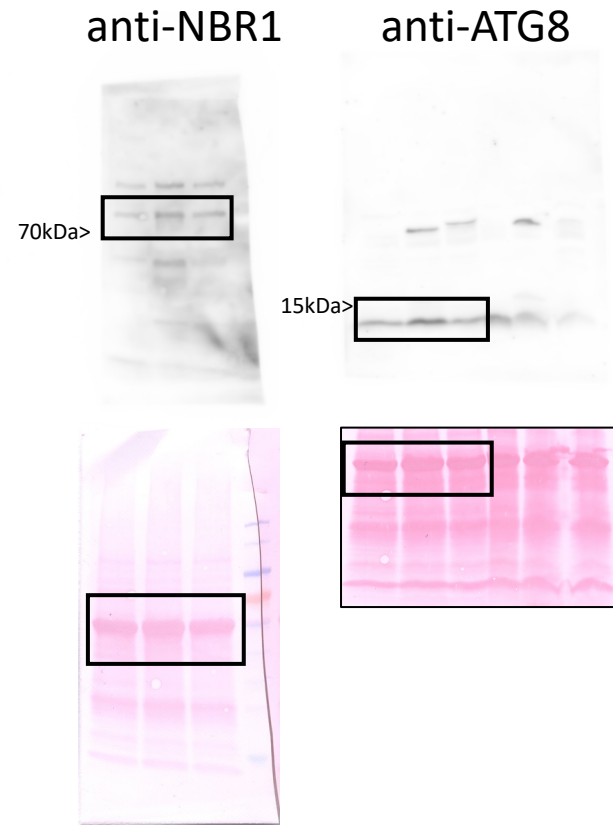

Supplement: EMBJ-41-e110352-s008.pdf [file EMBJ-41-e110352-s008.pdf]
